# Supplementary material for: Legume Cover Crop Alleviates the Negative Impact of No-Till on Tomato Productivity in a Mediterranean Organic Cropping System
Source: MDPI journal article supplement (doi:10.3390/agronomy13082027), 2023-07-30

**Table S1.** *p*-values from the linear models fitted for the dependent variables evaluated at cover crop termination. Significant *p*-values are marked in bold ( $p \leq 0.05$ ).

| Variable           | Cover crop (CC)  | Year (Y)         | Block        | CC $\times$ Y    |
|--------------------|------------------|------------------|--------------|------------------|
| Cover crop biomass | <b>&lt;0.001</b> | 0.398            | <b>0.010</b> | 0.927            |
| Weed biomass       | <b>&lt;0.001</b> | <b>0.001</b>     | 0.892        | 0.084            |
| N concentration    | <b>&lt;0.001</b> | <b>&lt;0.001</b> | <b>0.038</b> | <b>0.008</b>     |
| P concentration    | <b>&lt;0.001</b> | <b>&lt;0.001</b> | <b>0.010</b> | <b>&lt;0.001</b> |
| N accumulation     | <b>&lt;0.001</b> | <b>0.023</b>     | 0.181        | 0.901            |
| P accumulation     | <b>&lt;0.001</b> | <b>&lt;0.001</b> | <b>0.006</b> | <b>0.013</b>     |

**Table S2.** *p*-values from the linear models fitted for SPAD and tomato plant height at different crop stages. Significant *p*-values are marked in bold ( $p \leq 0.05$ ).

| Term                                | SPAD             | Plant height     |
|-------------------------------------|------------------|------------------|
| Cover crop (CC)                     | <b>&lt;0.001</b> | <b>&lt;0.001</b> |
| Tillage (T)                         | <b>&lt;0.001</b> | <b>0.007</b>     |
| Year (Y)                            | 0.338            | <b>0.001</b>     |
| Stage (S) <sup>‡</sup>              | <b>&lt;0.001</b> | 0.999            |
| Block                               | 0.219            | 0.125            |
| CC $\times$ T                       | <b>&lt;0.001</b> | 0.194            |
| CC $\times$ Y                       | <b>0.001</b>     | <b>&lt;0.001</b> |
| T $\times$ Y                        | 0.375            | <b>&lt;0.001</b> |
| CC $\times$ S                       | 0.133            | <b>&lt;0.001</b> |
| T $\times$ S                        | <b>0.034</b>     | <b>0.003</b>     |
| Y $\times$ S                        | <b>&lt;0.001</b> | <b>&lt;0.001</b> |
| CC $\times$ T $\times$ Y            | <b>0.024</b>     | <b>0.001</b>     |
| CC $\times$ T $\times$ S            | 0.488            | 0.342            |
| CC $\times$ Y $\times$ S            | 0.086            | 0.504            |
| T $\times$ Y $\times$ S             | 0.419            | 0.643            |
| CC $\times$ T $\times$ Y $\times$ S | 0.417            | 0.230            |

<sup>‡</sup> Stage refers to the phenological stage/timing in which SPAD and plant height were evaluated during the cropping season

**Table S3.** *p*-values from the linear models fitted for the dependent variables of tomato performance evaluated after cover crop termination. NUtE is Nitrogen Utilization Efficiency index. Significant *p*-values are marked in bold (*p*≤0.05).

| Variable                   | Cover crop<br>(CC) | Tillage<br>(T) | Year<br>(Y)  | Block        | CC × T       | CC × Y       | T × Y        | CC × T × Y   |
|----------------------------|--------------------|----------------|--------------|--------------|--------------|--------------|--------------|--------------|
| Potential yield            | <0.001             | <0.001         | <0.001       | 0.053        | <b>0.023</b> | <b>0.008</b> | <b>0.006</b> | 0.150        |
| Unmarketable yield         | <0.001             | 0.075          | <0.001       | <b>0.048</b> | <0.001       | 0.653        | <b>0.021</b> | 0.797        |
| Total fresh yield          | <0.001             | <0.001         | <0.001       | <b>0.017</b> | <b>0.003</b> | <b>0.007</b> | <b>0.003</b> | 0.074        |
| No. mark. and green fruits | <0.001             | <b>0.001</b>   | <b>0.007</b> | 0.357        | 0.257        | <b>0.011</b> | 0.781        | 0.057        |
| No. unmarketable fruits    | <0.001             | <b>0.001</b>   | <0.001       | 0.167        | <b>0.005</b> | 0.954        | 0.368        | 0.749        |
| Total dry yield            | <0.001             | <0.001         | <b>0.002</b> | <b>0.015</b> | <b>0.005</b> | <b>0.007</b> | <b>0.003</b> | 0.164        |
| Shoot dry biomass          | <0.001             | <0.001         | <0.001       | 0.134        | <0.001       | <0.001       | <0.001       | <0.001       |
| Weed dry biomass           | 0.176              | 0.226          | <0.001       | 0.114        | <b>0.002</b> | 0.114        | <0.001       | 0.452        |
| Fruit dry matter content   | <0.001             | <b>0.001</b>   | <0.001       | 0.225        | 0.179        | 0.689        | 0.733        | <b>0.004</b> |
| Fruit N concentration      | <0.001             | <b>0.002</b>   | <b>0.001</b> | <b>0.013</b> | 0.572        | <0.001       | 0.212        | 0.812        |
| Shoot N concentration      | <0.001             | 0.099          | <0.001       | <b>0.044</b> | 0.382        | 0.655        | 0.369        | 0.082        |
| Fruit P concentration      | 0.434              | 0.800          | <0.001       | <b>0.002</b> | 0.784        | 0.162        | 0.538        | 0.859        |
| Shoot P concentration      | <0.001             | <0.001         | 0.077        | <0.001       | 0.882        | <b>0.025</b> | 0.506        | 0.083        |
| Fruit N accumulation       | <0.001             | <0.001         | <0.001       | <b>0.016</b> | <b>0.004</b> | <b>0.002</b> | <b>0.017</b> | 0.161        |
| Shoot N accumulation       | <0.001             | <0.001         | <0.001       | 0.051        | <0.001       | <0.001       | <0.001       | <b>0.001</b> |
| NUtE                       | <0.001             | 0.740          | <0.001       | 0.179        | 0.187        | <b>0.001</b> | 0.369        | 0.828        |
| Fruit P accumulation       | <0.001             | <b>0.018</b>   | 0.051        | <b>0.002</b> | <0.001       | <b>0.021</b> | <b>0.001</b> | 0.101        |
| Shoot P accumulation       | <b>0.024</b>       | <b>0.005</b>   | <0.001       | <b>0.026</b> | <0.001       | <0.001       | <b>0.001</b> | <0.001       |

**Table S4.** Effects (emmean  $\pm$  standard error) of tillage system, cover crop and year on tomato fruit number, fruit dry matter content, fruit and shoot P concentration (Pconc) and accumulation (Pacc).

| <i>Term</i>       | <b>Marketable and green fruits</b> |             | <b>Unmarketable fruits</b> |             | <b>Fruit dry Matter content</b> |            | <b>Pconc fruit</b>    |            | <b>Pconc shoot</b>    |            | <b>Pacc fruit</b>   |            | <b>Pacc shoot<sup>‡</sup></b> |            |
|-------------------|------------------------------------|-------------|----------------------------|-------------|---------------------------------|------------|-----------------------|------------|-----------------------|------------|---------------------|------------|-------------------------------|------------|
|                   | No m <sup>-2</sup>                 |             | No m <sup>-2</sup>         |             | g 100 g <sup>-1</sup>           |            | g 100 g <sup>-1</sup> |            | g 100 g <sup>-1</sup> |            | kg ha <sup>-1</sup> |            | kg ha <sup>-1</sup>           |            |
|                   | Emmean                             | $\pm$ SE    | Emmean                     | $\pm$ SE    | Emmean                          | $\pm$ SE   | Emmean                | $\pm$ SE   | Emmean                | $\pm$ SE   | Emmean              | $\pm$ SE   | Emmean                        | $\pm$ SE   |
| <i>Year</i>       |                                    |             |                            |             |                                 |            |                       |            |                       |            |                     |            |                               |            |
| 2020              | 50.29 b                            | $\pm$ 4.61  | 71.91 a                    | $\pm$ 7.50  | 7.91 a                          | $\pm$ 0.10 | 0.44 a                | $\pm$ 0.01 | 0.20 a                | $\pm$ 0.01 | 9.95 a              | $\pm$ 0.81 | 1.69 b                        | $\pm$ 0.09 |
| 2021              | 70.04 a                            | $\pm$ 6.04  | 5.52 b                     | $\pm$ 0.58  | 6.09 b                          | $\pm$ 0.07 | 0.27 b                | $\pm$ 0.01 | 0.22 a                | $\pm$ 0.01 | 8.09 a              | $\pm$ 0.62 | 4.20 a                        | $\pm$ 0.22 |
| <i>Tillage</i>    |                                    |             |                            |             |                                 |            |                       |            |                       |            |                     |            |                               |            |
| CT                | 71.55 a                            | $\pm$ 6.27  | 44.78 a                    | $\pm$ 5.84  | 6.80 b                          | $\pm$ 0.08 | 0.35 a                | $\pm$ 0.01 | 0.18 b                | $\pm$ 0.01 | 10.13 a             | $\pm$ 0.76 | 3.19 a                        | $\pm$ 0.18 |
| NT                | 48.78 a                            | $\pm$ 4.29  | 32.66 b                    | $\pm$ 4.72  | 7.20 a                          | $\pm$ 0.09 | 0.36 a                | $\pm$ 0.01 | 0.24 a                | $\pm$ 0.01 | 7.91 b              | $\pm$ 0.68 | 2.70 b                        | $\pm$ 0.15 |
| <i>Cover crop</i> |                                    |             |                            |             |                                 |            |                       |            |                       |            |                     |            |                               |            |
| Rye               | 45.28 b                            | $\pm$ 5.72  | 25.53 b                    | $\pm$ 4.64  | 7.17 ab                         | $\pm$ 0.12 | 0.36 a                | $\pm$ 0.01 | 0.22 a                | $\pm$ 0.01 | 7.01 b              | $\pm$ 0.74 | 2.82 a                        | $\pm$ 0.23 |
| S. clover         | 86.34 a                            | $\pm$ 10.34 | 60.80 a                    | $\pm$ 10.87 | 6.69 c                          | $\pm$ 0.12 | 0.34 a                | $\pm$ 0.01 | 0.16 b                | $\pm$ 0.01 | 11.89 a             | $\pm$ 1.27 | 3.16 a                        | $\pm$ 0.24 |
| Mixture           | 66.56 ab                           | $\pm$ 7.85  | 41.07 ab                   | $\pm$ 7.37  | 6.77 bc                         | $\pm$ 0.12 | 0.36 a                | $\pm$ 0.01 | 0.22 a                | $\pm$ 0.01 | 11.32 a             | $\pm$ 1.24 | 3.31 a                        | $\pm$ 0.25 |
| Control           | 42.49 b                            | $\pm$ 5.43  | 27.47 b                    | $\pm$ 5.58  | 7.37 a                          | $\pm$ 0.13 | 0.36 a                | $\pm$ 0.01 | 0.24 a                | $\pm$ 0.01 | 5.86 b              | $\pm$ 0.67 | 2.49 a                        | $\pm$ 0.22 |

Emmeans with different letters are statistically different ( $p \leq 0.05$ ); <sup>‡</sup> post hoc test shows no significant differences between cover crops;

S. clover: squarrose clover; CT: conventional tillage; NT: no-till

**Figure S1.** Effects of the interaction of cover crop and year (A) and cover crop and tillage system (B) on the number of marketable and green fruits, and unmarketable tomato fruits, respectively. In each interaction, different letters indicate significant differences ( $p \leq 0.05$ ); S. clover: squarrose clover; CT: conventional tillage; NT: no-till. Figure S1B: post hoc test shows no significant differences between treatments.

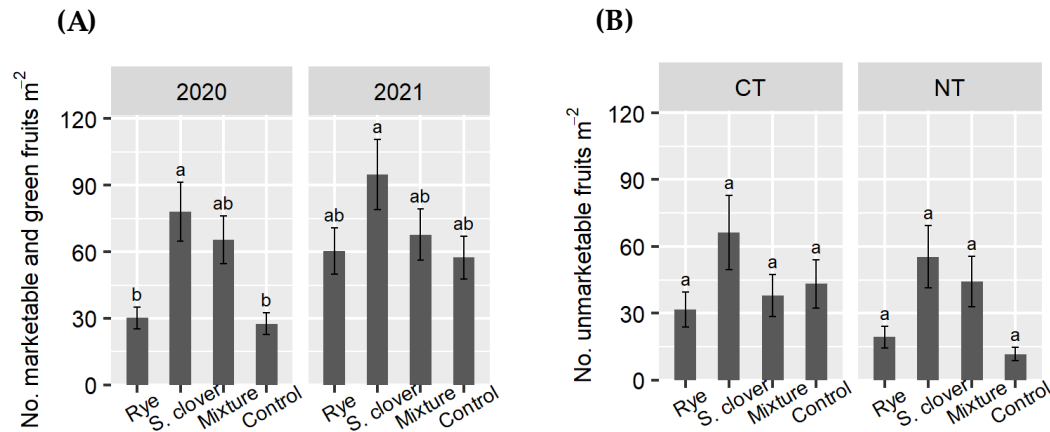

**Figure S2.** Effects of the interaction of tillage system and year (A), cover crop and year (B) and cover crop and tillage system (C) on P accumulation in tomato shoots and fruits. In each interaction, different letters indicate significant differences ( $p \leq 0.05$ ); S. clover: squarrose clover; CT: conventional tillage; NT: no-till.

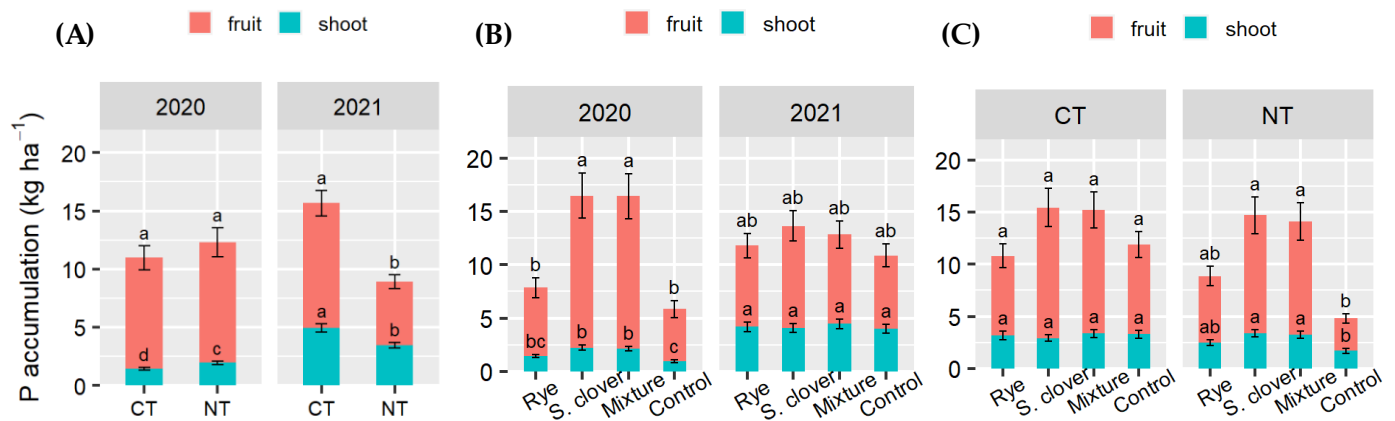

Supplement: s1 [file s1]
